# Supplementary material for: Thienoacene dimers based on the thieno[3,2-b]thiophene moiety: synthesis, characterization and electronic properties
Source: Royal Society of Chemistry journal article supplement (doi:10.1039/c4tc02158d), 2014-12-01

## Supporting Information for:

### **Thienoacene dimers based on the thieno[3,2-*b*]thiophene moiety: Synthesis, Characterization and Electronic Properties**

**Claude Niebel,<sup>a,§</sup> Yeongin Kim,<sup>b,§</sup> Christian Ruzié,<sup>a</sup> Jolanta Karpinska,<sup>a</sup> Basab Chattopadhyay,<sup>a</sup> Guillaume Schweicher,<sup>a</sup> Audrey Richard,<sup>a</sup> Vincent Lemaure,<sup>d</sup> Yoann Olivier,<sup>d</sup> Jérôme Cornil,<sup>d</sup> Alan R. Kennedy,<sup>e</sup> Ying Diao,<sup>c</sup> Wen-Ya Lee,<sup>c</sup> Stefan Mannsfeld,<sup>f</sup> Zhenan Bao,<sup>c</sup> and Yves H. Geerts<sup>\*a</sup>**

<sup>§</sup> These two authors have equally contributed and are co-first authors.

<sup>a</sup> Université Libre de Bruxelles (ULB), Laboratory of Polymer Chemistry, C.P. 206/01, Boulevard du Triomphe, 1050 Bruxelles, Belgium. Fax: +32 2650 5410; Tel: +32 2650 5390;

<sup>b</sup> Department of Electrical Engineering, Stanford University, Stanford, California, 94305, USA

<sup>c</sup> Department of Chemical Engineering, Stanford University, Stanford, California, 94305, USA

<sup>d</sup> Service de Chimie des Matériaux Nouveaux, Université de Mons (UMons), Place du Parc 20, 7000 Mons, Belgium

<sup>e</sup> Department of Pure and Applied Chemistry, University of Strathclyde, 295 Cathedral Street, Glasgow G1 1XL; Scotland

<sup>f</sup> Center for Advancing Electronics Dresden, Technische Universität Dresden, 01062 Dresden, Germany

**\* correspondence:** [ygeerts@ulb.ac.be](mailto:ygeerts@ulb.ac.be)

## TABLE OF CONTENTS

|                                                                                                                                              |                |
|----------------------------------------------------------------------------------------------------------------------------------------------|----------------|
| <b><sup>1</sup>H and <sup>13</sup>C NMR spectra</b>                                                                                          | <b>S3</b>      |
| <b>Figure S1:</b> <sup>1</sup> H NMR spectra of <b>7</b> in CDCl <sub>3</sub> (25°C)                                                         | <b>S3</b>      |
| <b>Figure S2:</b> <sup>13</sup> C NMR spectra of <b>7</b> in CDCl <sub>3</sub> (25°C)                                                        | <b>S3</b>      |
| <b>Figure S3:</b> <sup>1</sup> H NMR spectra of <b>8</b> in CDCl <sub>3</sub> (25°C)                                                         | <b>S4</b>      |
| <b>Figure S4:</b> <sup>13</sup> C NMR spectra of <b>8</b> in CDCl <sub>3</sub> (25°C)                                                        | <b>S4</b>      |
| <b>Figure S5:</b> <sup>1</sup> H NMR spectra of <b>9</b> in CDCl <sub>3</sub> (25°C)                                                         | <b>S5</b>      |
| <b>Figure S6:</b> <sup>13</sup> C NMR spectra of <b>9</b> in CDCl <sub>3</sub> (25°C)                                                        | <b>S5</b>      |
| <b>Figure S7:</b> <sup>1</sup> H NMR spectra of <b>10</b> in CDCl <sub>3</sub> (25°C)                                                        | <b>S6</b>      |
| <b>Figure S8:</b> <sup>13</sup> C NMR spectra of <b>10</b> in CDCl <sub>3</sub> (25°C)                                                       | <b>S6</b>      |
| <b>Figure S9:</b> <sup>1</sup> H NMR spectra of <b>4b</b> in CDCl <sub>3</sub> (25°C)                                                        | <b>S7</b>      |
| <br><b>Mass spectra</b>                                                                                                                      | <br><b>S8</b>  |
| <b>Figure S10:</b> High resolution EI mass spectrum of <b>7</b>                                                                              | <b>S8</b>      |
| <b>Figure S11:</b> High resolution EI mass spectrum of <b>10</b>                                                                             | <b>S9</b>      |
| <b>Figure. S12:</b> High resolution EI mass spectrum of <b>4a</b>                                                                            | <b>S10</b>     |
| <b>Figure. S13:</b> High resolution MALDI mass spectrum of <b>4b</b>                                                                         | <b>S11</b>     |
| <br><b>UV-Vis and Fluorescence spectra</b>                                                                                                   | <br><b>S12</b> |
| <b>Figure S14:</b> Absorption spectra of <b>1a</b> , <b>4a,b</b> , and <b>9</b> ,                                                            | <b>S12</b>     |
| <b>Figure S15:</b> Absorption spectra of thin films of <b>1a</b> , <b>4a</b> , and <b>4b</b>                                                 | <b>S13</b>     |
| <b>Figure S16:</b> Emission spectra of <b>4a</b> and <b>4b</b>                                                                               | <b>S13</b>     |
| <br><b>PESA spectra</b>                                                                                                                      | <br><b>S14</b> |
| <b>Figure S17:</b> PESA spectra of thin films of <b>1a</b> , <b>4a</b> , and <b>4b</b>                                                       | <b>S14</b>     |
| <br><b>TFT characteristics</b>                                                                                                               | <br><b>S15</b> |
| <b>Table S1:</b> Summary of data for TFTs                                                                                                    | <b>S15</b>     |
| <br><b>Thin-film morphologies</b>                                                                                                            | <br><b>S16</b> |
| <b>Figure S18:</b> AFM height images of thin films of <b>4a</b> on three kinds of dielectric                                                 | <b>S16</b>     |
| <b>Figure S19:</b> AFM height images of thin films of <b>4b</b> on three kinds of dielectric                                                 | <b>S16</b>     |
| <b>Figure S20:</b> AFM height images of thin films of <b>4a</b> with various nominal thicknesses (1-40nm)                                    | <b>S17</b>     |
| <b>Figure S21:</b> AFM phase images of thin films of <b>4b</b> with various nominal thicknesses (1-40nm)                                     | <b>S17</b>     |
| <b>Figure S22:</b> Optical micrograph of solution-sheared thin films of <b>1a</b>                                                            | <b>S17</b>     |
| <br><b>Grazing incidence X-ray diffraction (GIXD) of thin films</b>                                                                          | <br><b>S18</b> |
| <b>Figure S23:</b> Grazing incidence X-ray diffraction (GIXD) images of thin films of <b>4a</b> and <b>4b</b> for various T <sub>dep</sub> . | <b>S18</b>     |
| <b>Table S2:</b> Lattice parameters of thin films of <b>4a</b> and <b>4b</b> as determined from GIXD data.                                   | <b>S19</b>     |
| <b>Figure S24:</b> Coherence lengths of thin films of <b>4a</b> and <b>4b</b> .                                                              | <b>S19</b>     |

**Figure. S1.** <sup>1</sup>H NMR spectra of **7** in CDCl<sub>3</sub> (25°C)

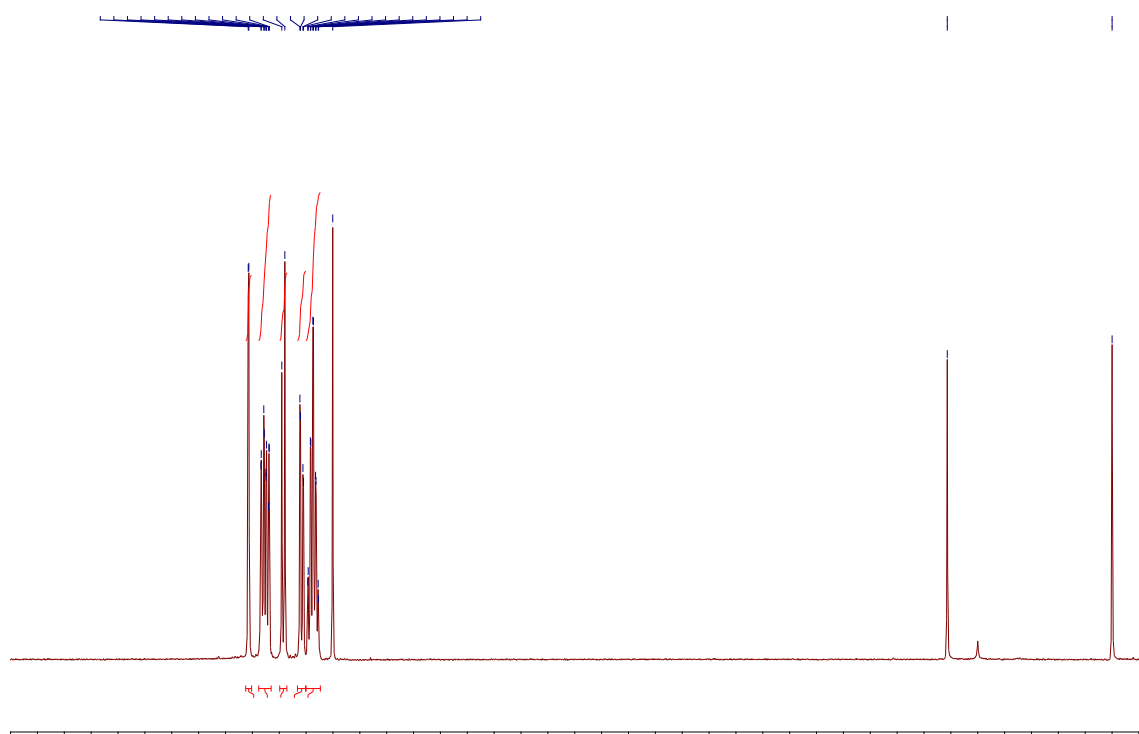

**Figure. S2.** <sup>13</sup>C NMR spectra of **7** in CDCl<sub>3</sub> (25°C)

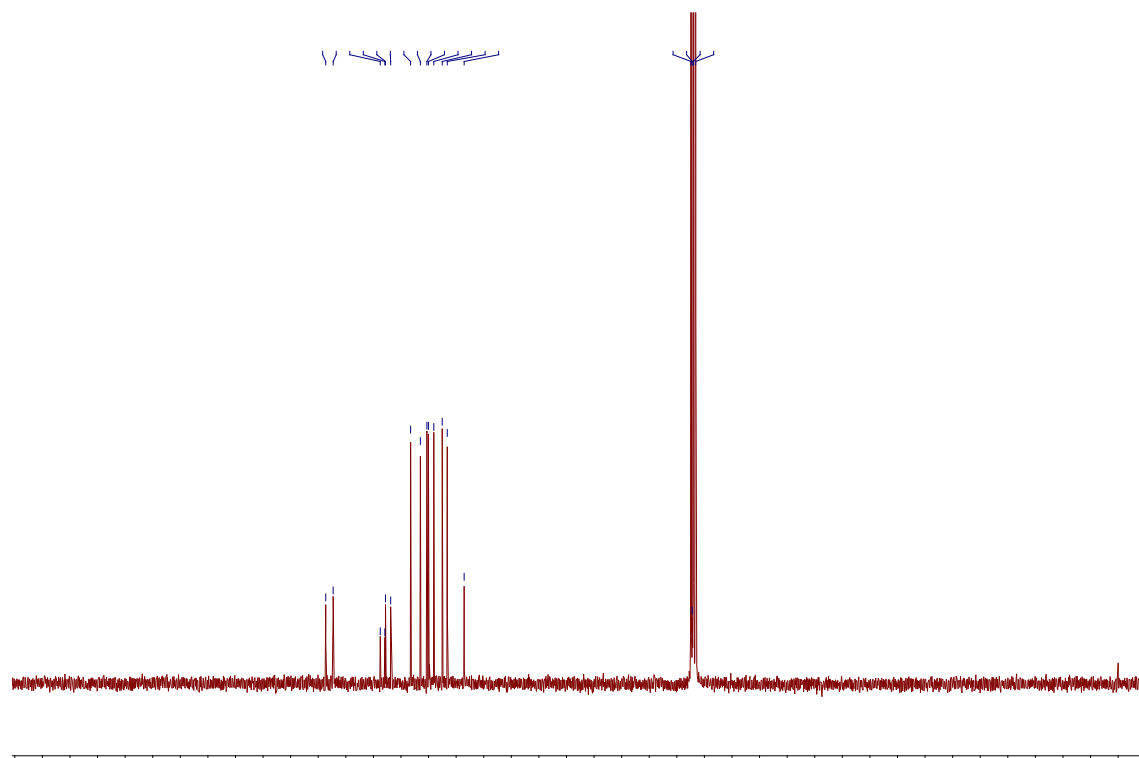

**Figure. S3.**  $^1\text{H}$  NMR spectra of **8** in  $\text{CDCl}_3$  (25°C)

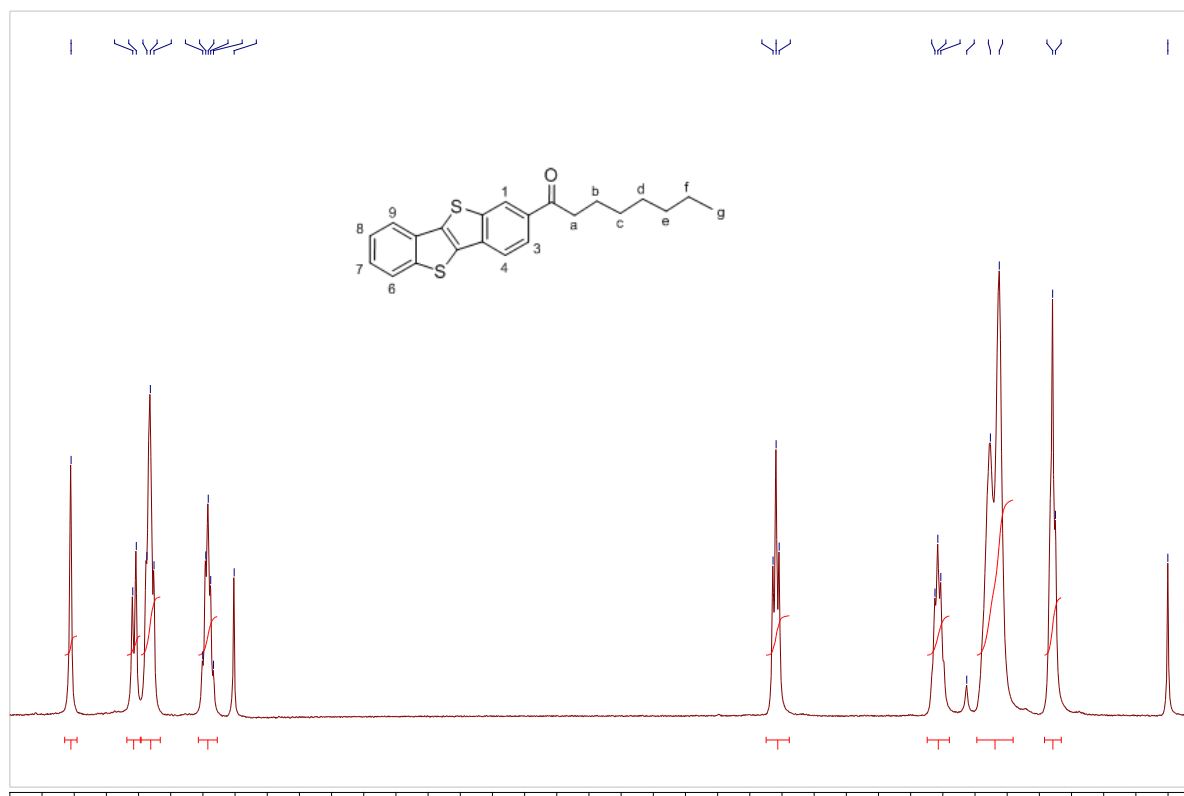

**Figure. S4.**  $^{13}\text{C}$  NMR spectra of **8** in  $\text{CDCl}_3$  (25°C)

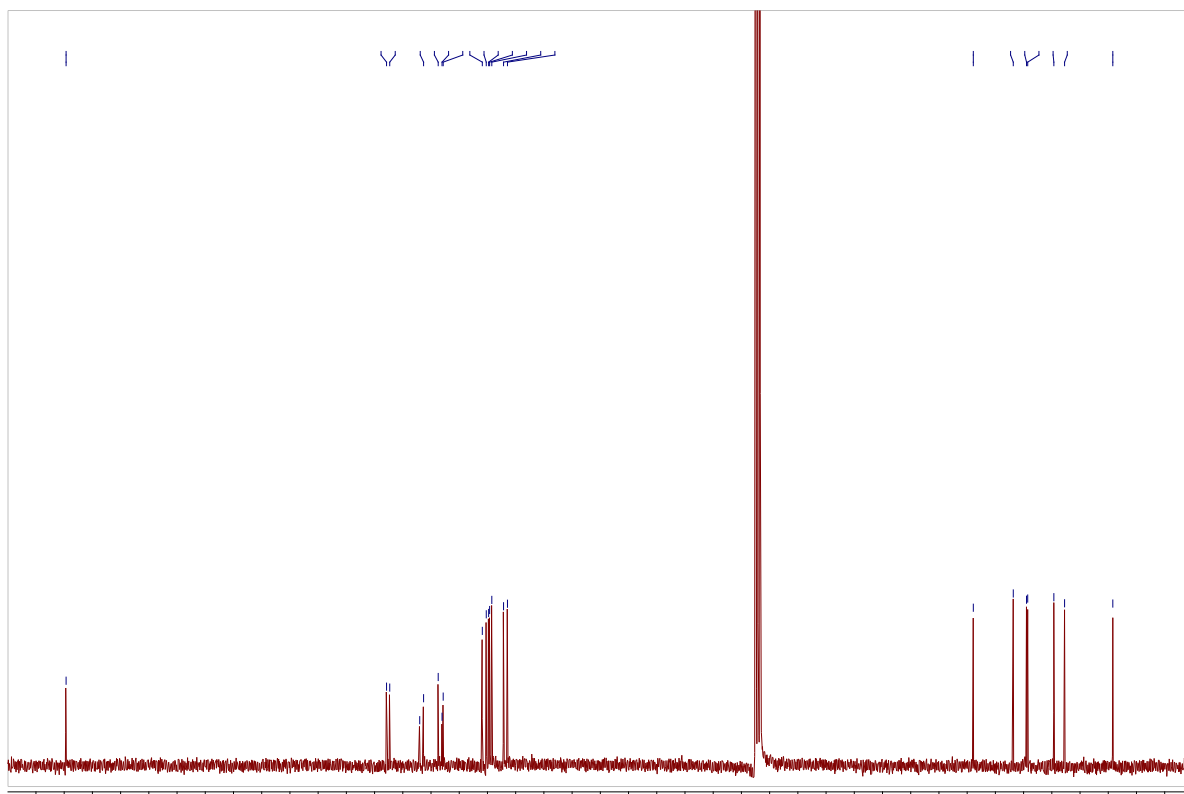

**Figure. S5.**  $^1\text{H}$  NMR spectra of **9** in  $\text{CDCl}_3$  (25°C)

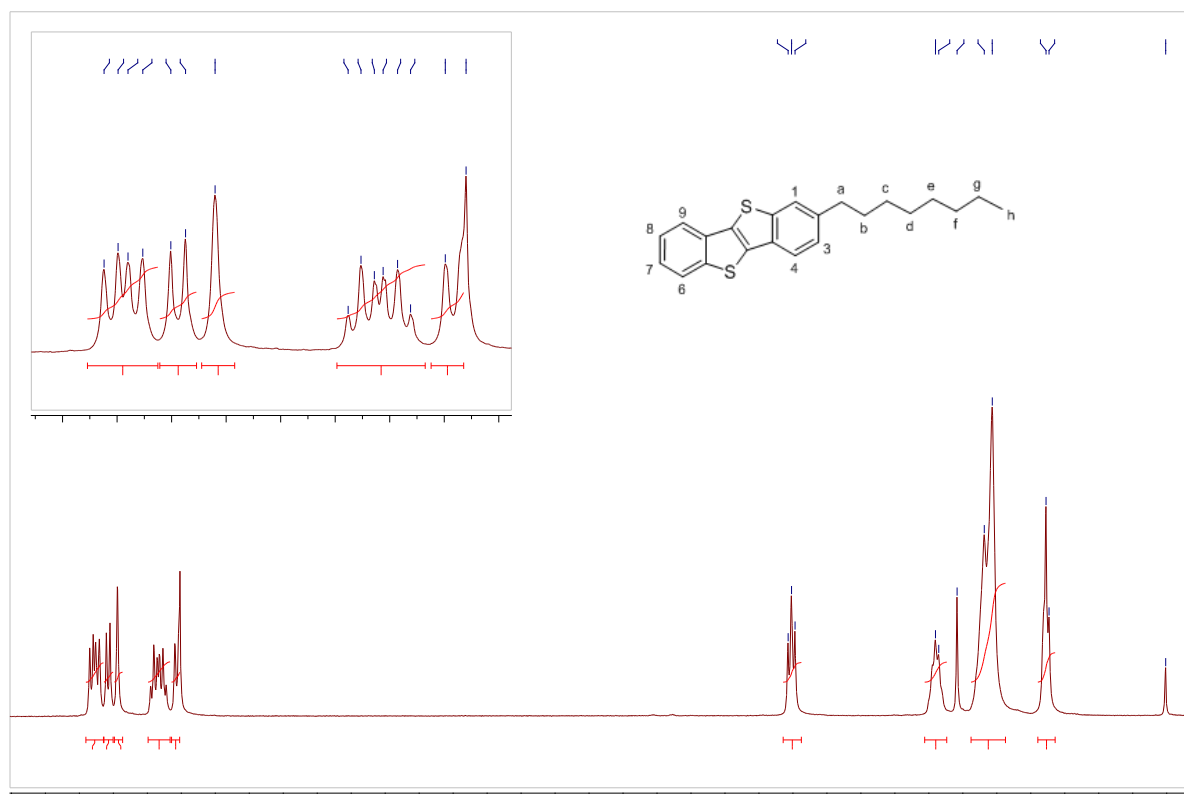

**Figure. S6.**  $^{13}\text{C}$  NMR spectra of **9** in  $\text{CDCl}_3$  (25°C)

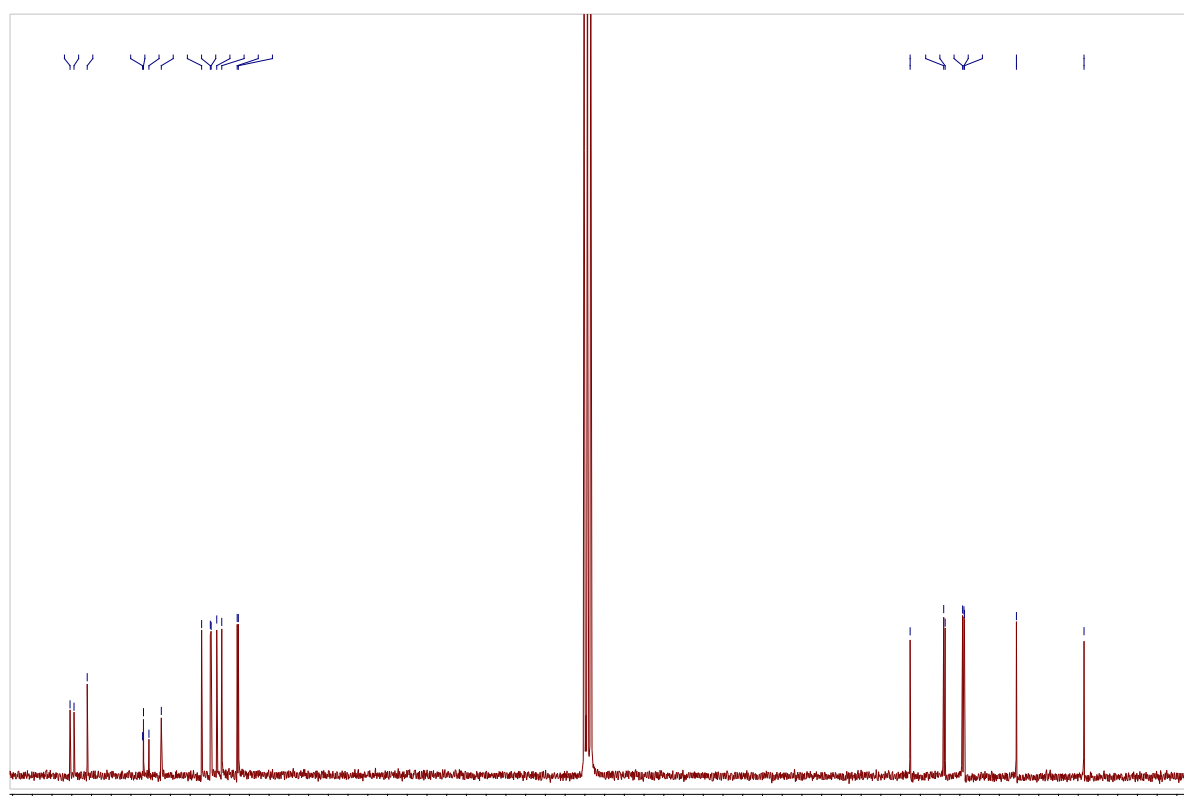

**Figure. S7.**  $^1\text{H}$  NMR spectra of **10** in  $\text{CDCl}_3$  (25°C)

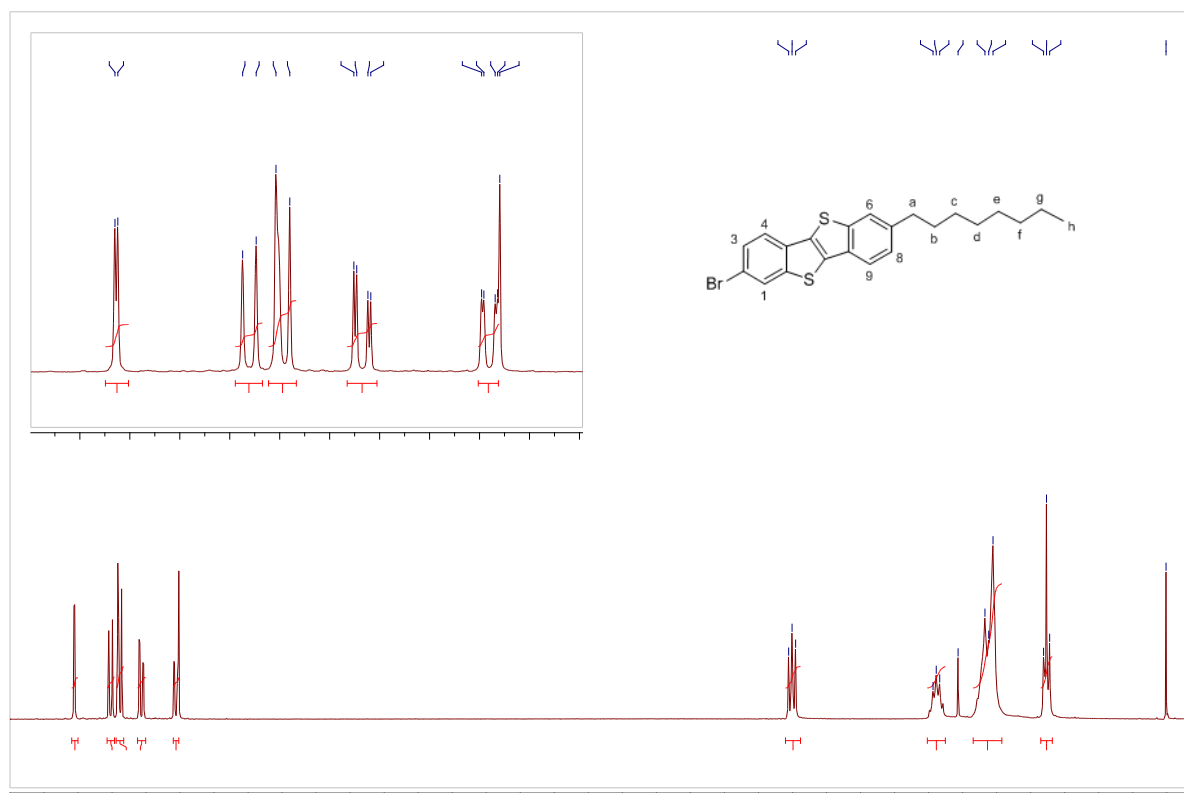

**Figure. S8.**  $^{13}\text{C}$  NMR spectra of **10** in  $\text{CDCl}_3$  (25°C)

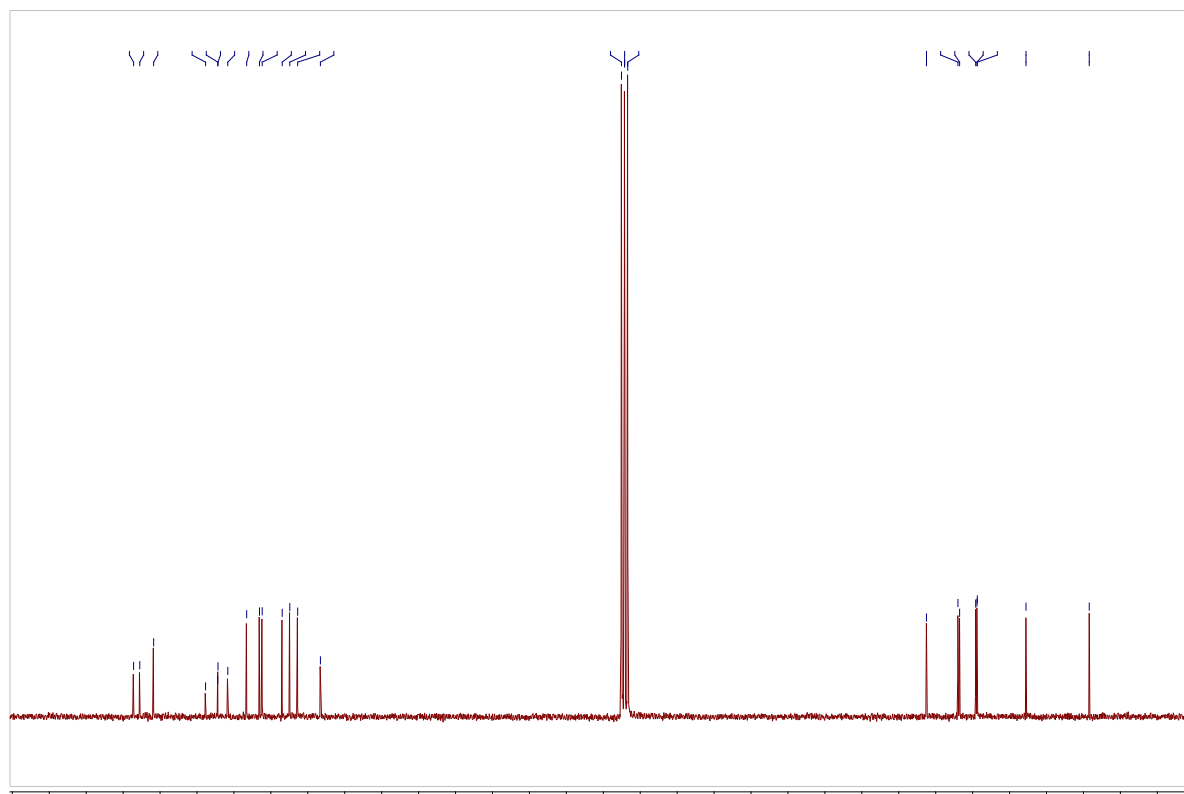

**Figure. S9.**  $^1\text{H}$  NMR spectra of **4b** in  $\text{C}_2\text{D}_2\text{Cl}_4$  (100°C)

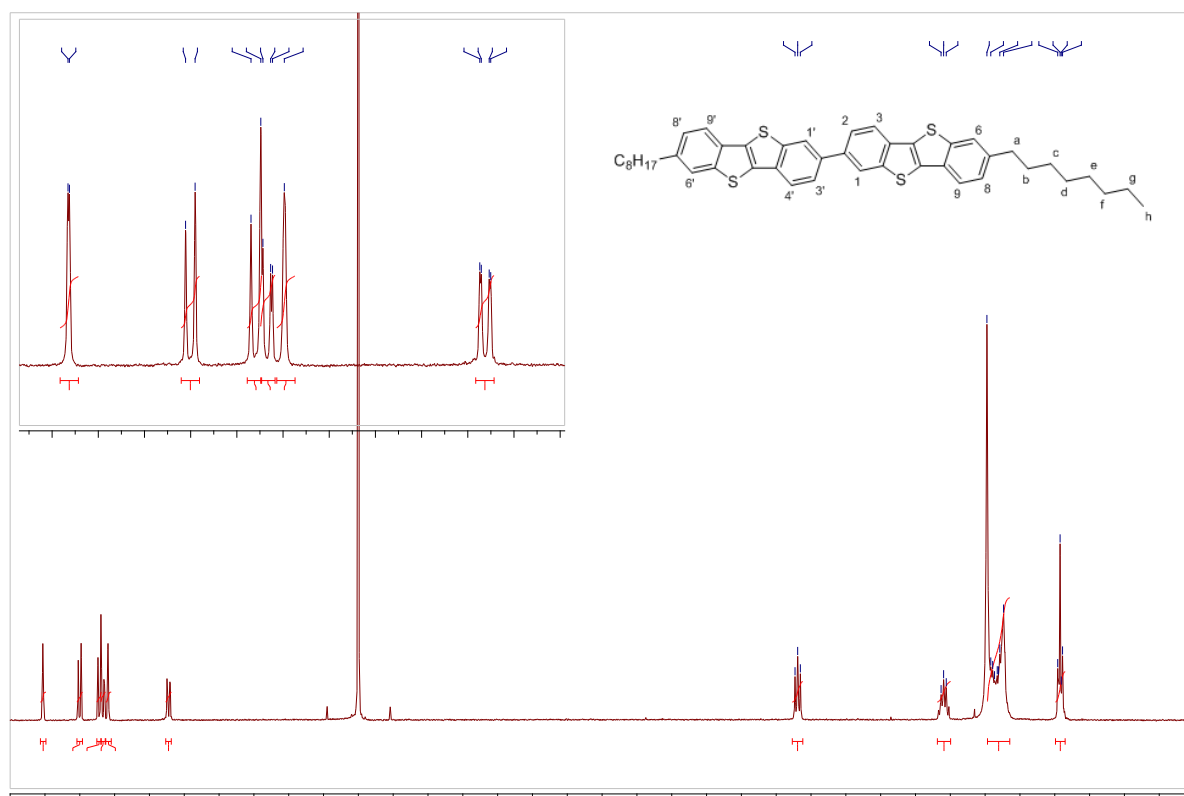

# Mass spectra

**Figure S10.** High resolution EI mass spectrum of **7**

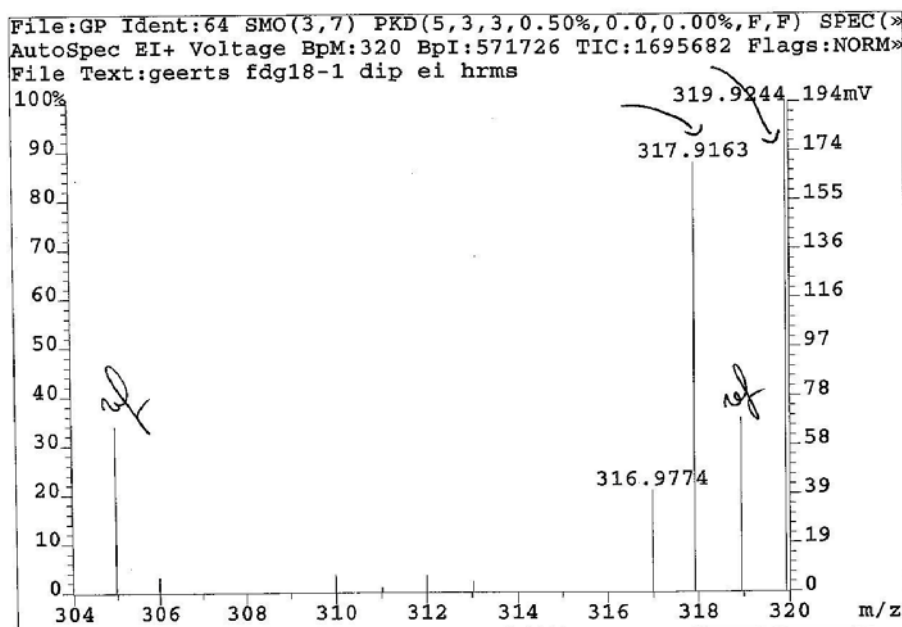

File:GP Ident:64 SMO(3,7) PKD(5,3,3,0.50%,0.0,0.00%,F,F) SPEC(Heights,Centroid)  
 AutoSpec EI+ Voltage BpM:320 BpI:571726 TIC:1695682 Flags:NORM  
 File Text:geerts fdg18-1 dip ei hrms  
 Heteroatom Max: 20 Ion: Both Even and Odd  
 Limits:

| 317.916299 | 50.0  |       |            | -0.5 | 0   | 0   | 0 | 0 | 0 | 0  | 0 | 0 |
|------------|-------|-------|------------|------|-----|-----|---|---|---|----|---|---|
|            |       |       |            | 20.0 | 200 | 400 | 1 | 2 | 2 | 1  | 1 | 1 |
| Mass       | PM    | mDa   | Calc. Mass | DBE  | C   | H   | N | O | S | Br | I |   |
| 317.916299 | 3.0   | 1.0   | 317.917255 | 11.0 | 14  | 7   |   |   | 2 | 1  |   |   |
|            | 4.7   | 1.5   | 317.917781 | 12.0 | 13  | 3   |   | 2 |   |    | 1 |   |
|            | -7.6  | -2.4  | 317.913883 | 16.0 | 17  | 3   |   |   | 1 | 1  |   |   |
|            | 8.7   | 2.8   | 317.919064 | 16.5 | 16  | 1   | 1 | 2 |   | 1  |   |   |
|            | -13.7 | -4.4  | 317.911949 | 2.5  | 6   | 9   | 1 | 2 | 2 |    |   | 1 |
|            | -14.7 | -4.7  | 317.911628 | 1.0  | 7   | 12  |   | 1 |   | 1  | 1 |   |
|            | 15.3  | 4.9   | 317.921153 | 7.0  | 10  | 7   |   | 2 | 1 |    | 1 |   |
|            | 19.3  | 6.1   | 317.922436 | 11.5 | 13  | 5   | 1 | 2 | 1 | 1  |   |   |
|            | -24.3 | -7.7  | 317.908577 | 7.5  | 9   | 5   | 1 | 2 | 1 |    | 1 |   |
|            | 25.9  | 8.2   | 317.924525 | 2.0  | 7   | 11  |   | 2 | 2 |    | 1 |   |
|            | 29.9  | 9.5   | 317.925808 | 6.5  | 10  | 9   | 1 | 2 | 2 | 1  |   |   |
|            | -34.9 | -11.1 | 317.905205 | 12.5 | 12  | 1   | 1 | 2 |   |    | 1 |   |
|            | -36.6 | -11.6 | 317.904679 | 11.5 | 13  | 5   | 1 |   | 2 | 1  |   |   |
|            | -40.6 | -12.9 | 317.903396 | 7.0  | 10  | 7   |   |   | 2 |    | 1 |   |
|            | -47.2 | -15.0 | 317.901307 | 16.5 | 16  | 1   | 1 |   | 1 | 1  |   |   |
|            | 48.3  | 15.3  | 317.931641 | 16.0 | 17  | 3   |   | 2 |   | 1  |   |   |



**Figure S11.** High resolution EI mass spectrum of **10**

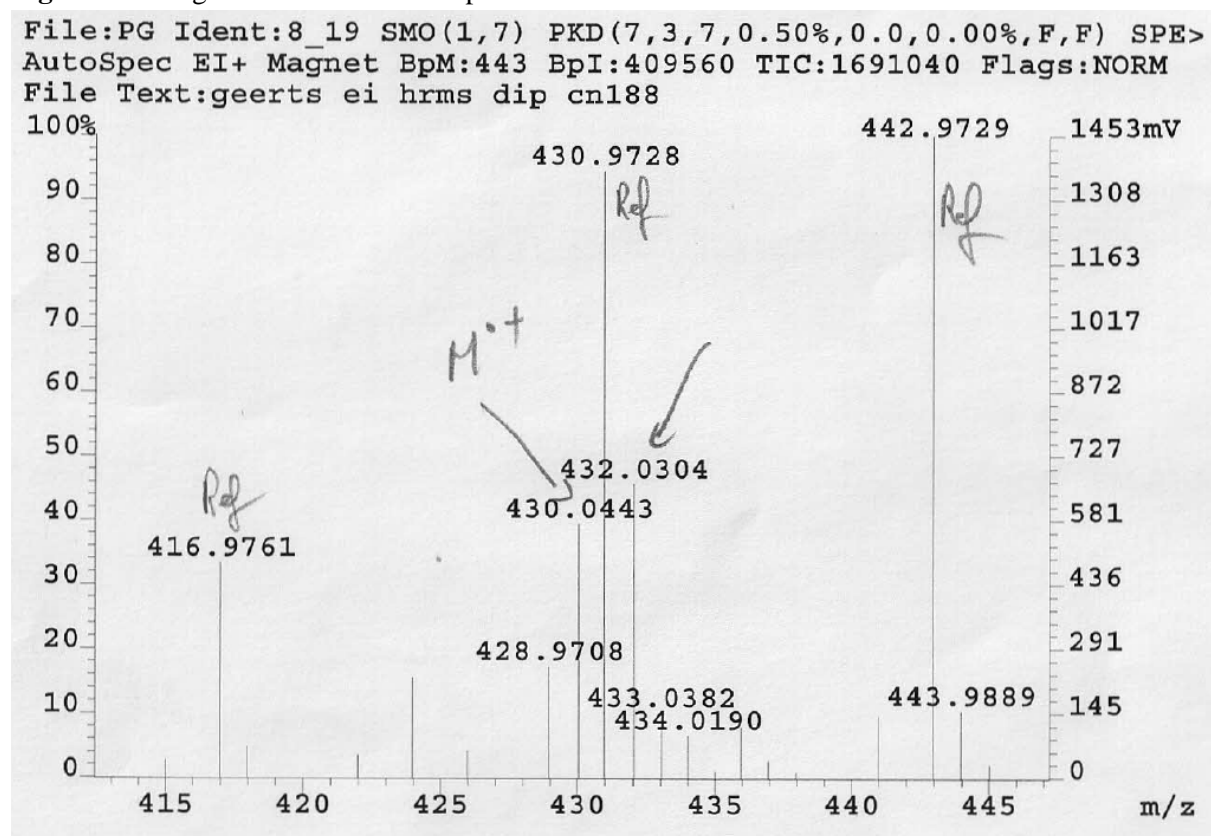

File:PG Ident:8\_19 SMO(1,7) PKD(7,3,7,0.50%,0.0,0.00%,F,F)  
 AutoSpec EI+ Magnet BpM:443 BpI:409560 TIC:1691040 Flags:NORM  
 File Text:geerts ei hrms dip cn188  
 Heteroatom Max: 20 Ion: Both Even and Odd  
 Limits:

|            |      |      |            | -0.5 | 0   | 0   | 2 | 1  |
|------------|------|------|------------|------|-----|-----|---|----|
| 430.044323 | 50.0 |      |            | 20.0 | 200 | 400 | 2 | 1  |
| Mass       | PPM  | mDa  | Calc. Mass | DBE  | C   | H   | S | Br |
| 430.044323 | -4.3 | -1.9 | 430.042456 | 11.0 | 22  | 23  | 2 | 1  |

**Figure. S12.** High resolution EI mass spectrum of **4a**

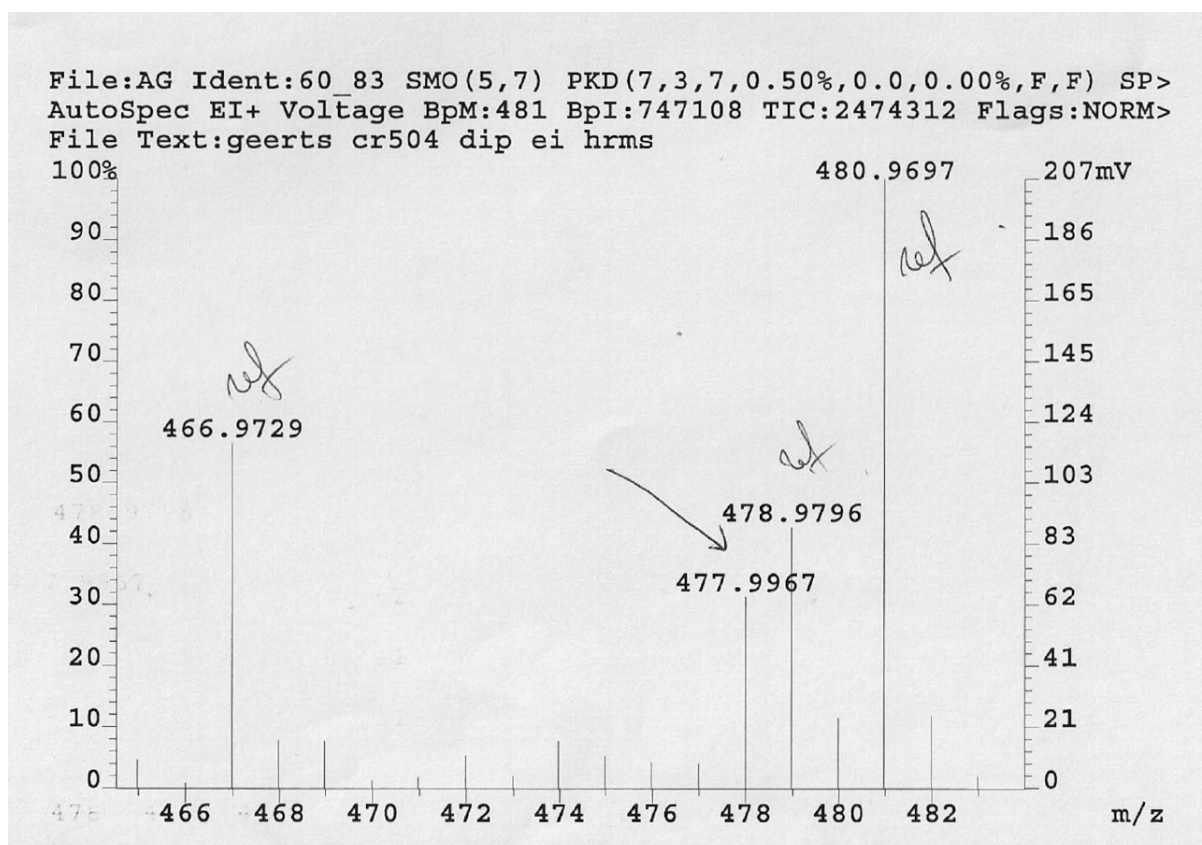

File:AG Ident:60\_83 SMO(5,7) PKD(7,3,7,0.50%,0.0,0.00%,F,F)  
 AutoSpec EI+ Voltage BpM:481 BpI:747108 TIC:2474312 Flags:NORM  
 File Text:geerts cr504 dip ei hrms

Heteroatom Max: 20 Ion: Both Even and Odd

Limits:

|            |     |      |            | -0.5 | 0   | 0   | 4 |
|------------|-----|------|------------|------|-----|-----|---|
| 477.995831 |     | 50.0 |            | 50.0 | 200 | 400 | 4 |
| Mass       | PPM | mDa  | Calc. Mass | DBE  | C   | H   | S |
| 477.995831 | 4.2 | 2.0  | 477.997838 | 22.0 | 28  | 14  | 4 |

**Figure. S13.** High resolution MALDI mass spectrum of **4b**

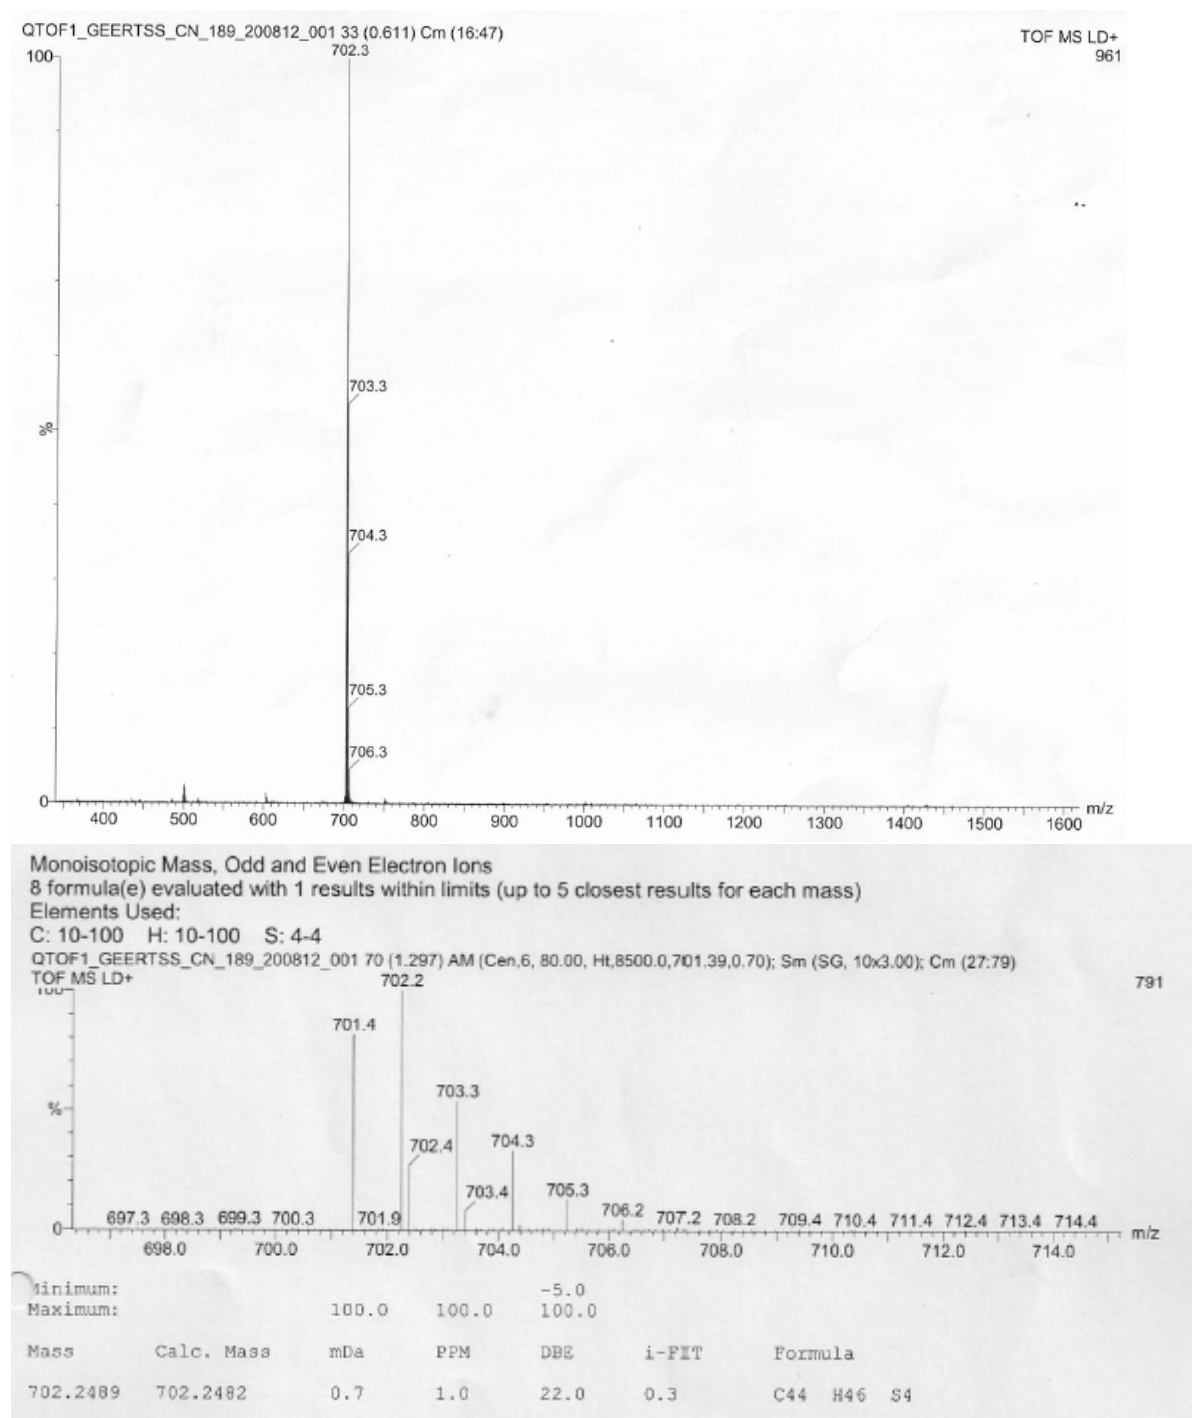

## UV-Vis and Fluorescence spectra

Absorption spectra of toluene solutions of **1a**, **9**, **4a**, **4b** were recorded on an Agilent 8453 spectrophotometer in a quartz cell (optical path of 1 cm) in toluene (concentration solutions of  $10^{-5}$ M were used). Thin films of **1a**, **4a**, and **4b** were prepared on sapphire using shearing (**1a**) and on glass slides using thermal evaporation (**4a** and **4b**). Absorption spectra of thin films of **1a**, **4a**, and **4b** were recorded using Agilent Cary 6000i UV/Vis/NIR spectrophotometer. Emission spectra of toluene solutions of **4a** and **4b** were measured on an Aminco Bowman series 2 luminescence spectrophotometer. Measurements have been done at room temperature.

**Figure S14:** Absorption spectra of toluene solutions ( $\sim 10^{-5}$ M) of **1a** (red), **9** (black), **4a** (green), and **4b** (blue). The difference of  $\lambda_{\max}$  between **4a** and **4b** is assigned to different torsion angles between BTBT units.

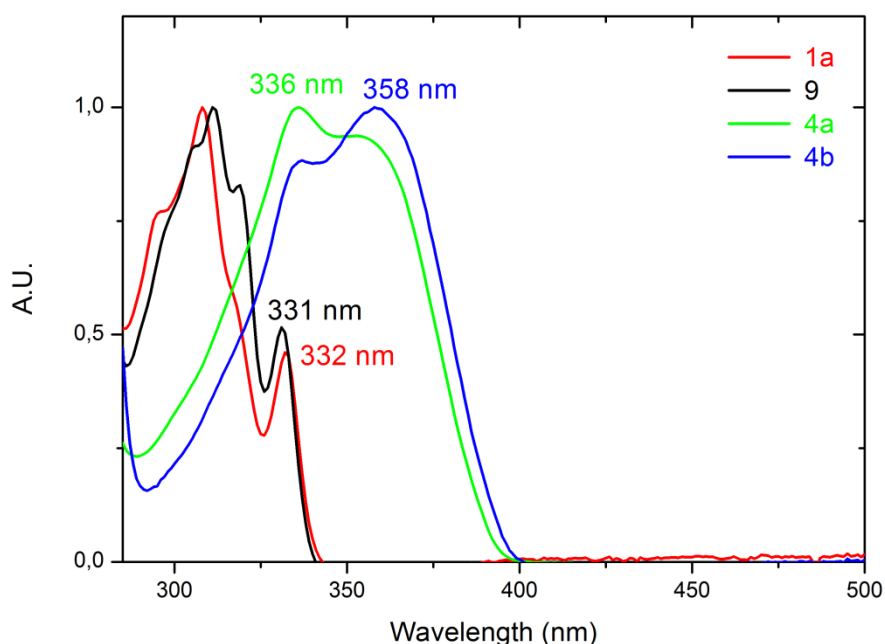

**Figure S15:** Absorption spectra of thin films of **1a**, **4a**, and **4b** prepared on sapphire using shearing (**1a**) and deposited on glass slides by thermal evaporation (**4a** and **4b**)

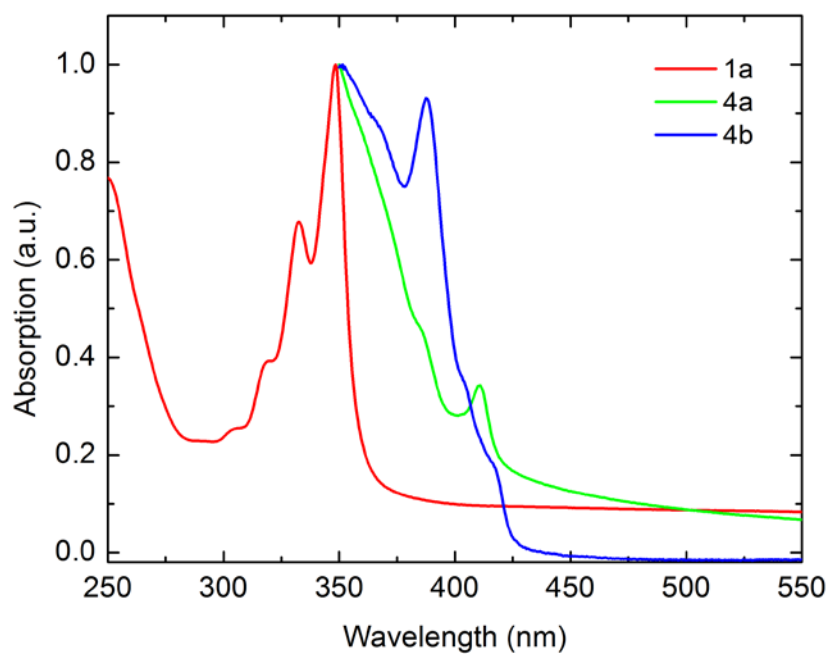

**Figure S16:** Fluorescence spectra of  $10^{-5}$  M toluene solutions of **4a** (green) and **4b** (blue)

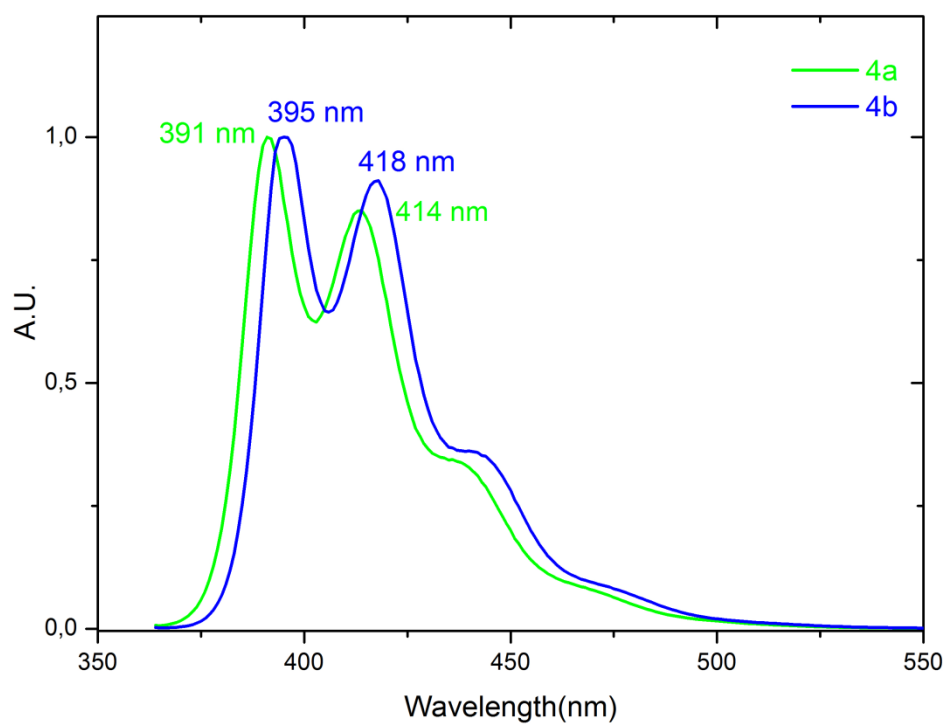

## PESA spectra

Thin films of **1a**, **4a**, and **4b** were prepared on sapphire using shearing (**1a**) and on glass slides through thermal evaporation (**4a** and **4b**). Photoelectron spectroscopy in air (PESA) spectra of thin films of **1a**, **4a**, and **4b** were recorded using Riken Keiki photoelectron spectrometer in air (model AC-2)

**Figure S17:** PESA spectra of thin films of **1a**, **4a**, and **4b** deposited on sapphire by shearing (**1a**) and on glass slides by thermal evaporation (**4a** and **4b**).

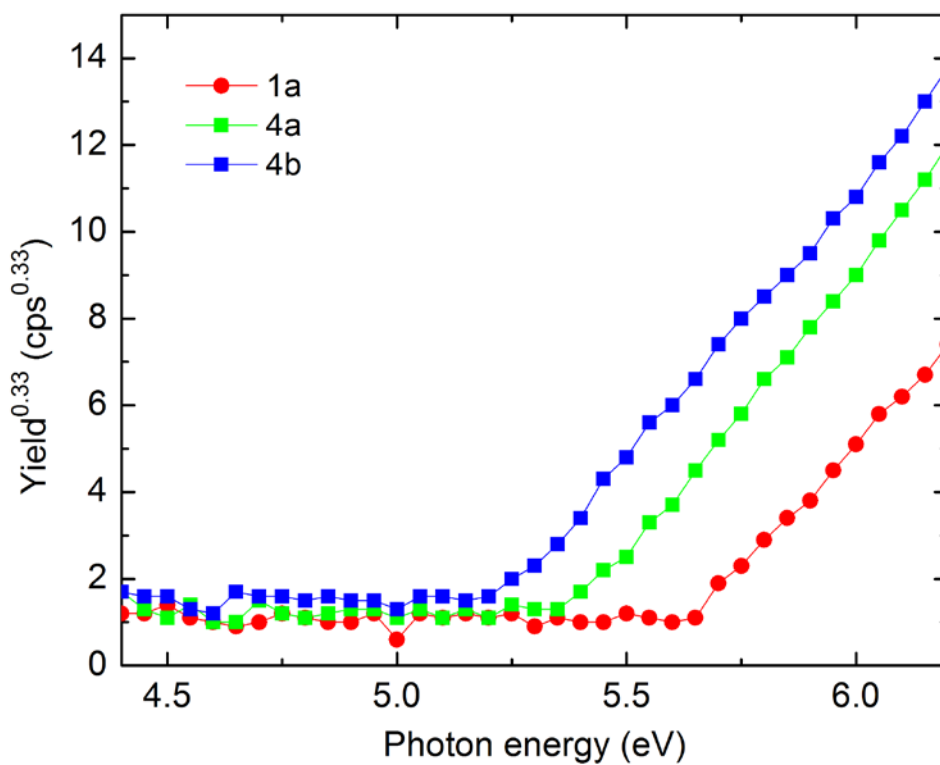

# TFT characteristics

**Table S1:** Summary of data for TFTs

| Compound  | Gate dielectric                         | T <sub>dep</sub> [°C] | μ <sub>sat</sub> [cm <sup>2</sup> V <sup>-1</sup> s <sup>-1</sup> ] | I <sub>on</sub> /I <sub>off</sub> | V <sub>T</sub> [V] |
|-----------|-----------------------------------------|-----------------------|---------------------------------------------------------------------|-----------------------------------|--------------------|
| <b>4a</b> | SiO <sub>2</sub> (300nm)                | 25                    | 0.0069 ± 0.0007                                                     | (1.8 ± 1.7) × 10 <sup>4</sup>     | -(20 ± 5)          |
|           |                                         | 60                    | 0.025 ± 0.001                                                       | (4.0 ± 4.4) × 10 <sup>4</sup>     | -(17 ± 1)          |
|           |                                         | 90                    | 0.043 ± 0.003                                                       | (4.6 ± 4.1) × 10 <sup>4</sup>     | -(4.2 ± 2.0)       |
|           |                                         | 120                   | 0.094 ± 0.009                                                       | (7.5 ± 11.5) × 10 <sup>5</sup>    | -(31 ± 1)          |
|           | BCB (50nm)<br>on                        | 25                    | 0.038 ± 0.003                                                       | (1.3 ± 0.7) × 10 <sup>5</sup>     | -(28 ± 2)          |
|           |                                         | 60                    | 0.16 ± 0.01                                                         | (7.9 ± 6.8) × 10 <sup>5</sup>     | -(20 ± 1)          |
|           | SiO <sub>2</sub> (300nm)                | 90                    | 0.29 ± 0.02                                                         | (5.4 ± 5.4) × 10 <sup>5</sup>     | -(18 ± 1)          |
|           |                                         | 120                   | 0.29 ± 0.04                                                         | (4.3 ± 1.2) × 10 <sup>4</sup>     | -(36 ± 4)          |
|           | OTS-treated<br>SiO <sub>2</sub> (300nm) | 25                    | 0.085 ± 0.009                                                       | (1.5 ± 3.6) × 10 <sup>7</sup>     | -(21 ± 1)          |
|           |                                         | 60                    | 0.39 ± 0.01                                                         | (3.7 ± 3.3) × 10 <sup>7</sup>     | -(14 ± 2)          |
|           |                                         | 90                    | 0.41 ± 0.05                                                         | (3.6 ± 2.8) × 10 <sup>6</sup>     | -(10 ± 2)          |
|           |                                         | 120                   | 0.67 ± 0.12                                                         | (2.9 ± 0.8) × 10 <sup>5</sup>     | -(23 ± 3)          |
| <b>4b</b> | SiO <sub>2</sub> (300nm)                | 25                    | 0.0019 ± 0.0001                                                     | (3.1 ± 1.1) × 10 <sup>5</sup>     | -(30 ± 7)          |
|           |                                         | 60                    | 0.15 ± 0.02                                                         | (1.1 ± 0.4) × 10 <sup>5</sup>     | -(12 ± 3)          |
|           |                                         | 90                    | 0.31 ± 0.01                                                         | (6.5 ± 6.0) × 10 <sup>5</sup>     | -(18 ± 1)          |
|           |                                         | 120                   | 0.29 ± 0.01                                                         | (2.0 ± 0.6) × 10 <sup>4</sup>     | 5.0 ± 2.5          |
|           | BCB (50nm)<br>on                        | 25                    | 0.010 ± 0.001                                                       | (7.1 ± 0.2) × 10 <sup>3</sup>     | -(42 ± 3)          |
|           |                                         | 60                    | 0.18 ± 0.01                                                         | (4.7 ± 3.9) × 10 <sup>5</sup>     | -(19 ± 2)          |
|           | SiO <sub>2</sub> (300nm)                | 90                    | 0.33 ± 0.03                                                         | (2.5 ± 0.9) × 10 <sup>5</sup>     | -(29 ± 3)          |
|           |                                         | 120                   | 0.53 ± 0.01                                                         | (1.7 ± 0.3) × 10 <sup>5</sup>     | -(14 ± 2)          |
|           | OTS-treated<br>SiO <sub>2</sub> (300nm) | 25                    | 0.34 ± 0.04                                                         | (2.9 ± 1.2) × 10 <sup>5</sup>     | -(33 ± 1)          |
|           |                                         | 60                    | 1.33 ± 0.09                                                         | (7.9 ± 3.1) × 10 <sup>5</sup>     | -(25 ± 1)          |
|           |                                         | 90                    | 1.17 ± 0.09                                                         | (1.4 ± 3.2) × 10 <sup>6</sup>     | -(29 ± 1)          |
|           |                                         | 120                   | 0.15 ± 0.02                                                         | (1.5 ± 1.2) × 10 <sup>6</sup>     | -(17 ± 3)          |

T<sub>dep</sub> is the substrate temperature during the deposition of thin-films. μ<sub>sat</sub> is the mobility value in saturation region. All the measurements were done in air under dark condition.

**Figure S18:** AFM height images of thin films of **4a** on three kinds of dielectric. The nominal thicknesses of all the films were 40nm. The substrate temperature during deposition was 120°C, at which we have obtained the highest mobility for **4a**. The sizes of all the images were 5μm×5μm.

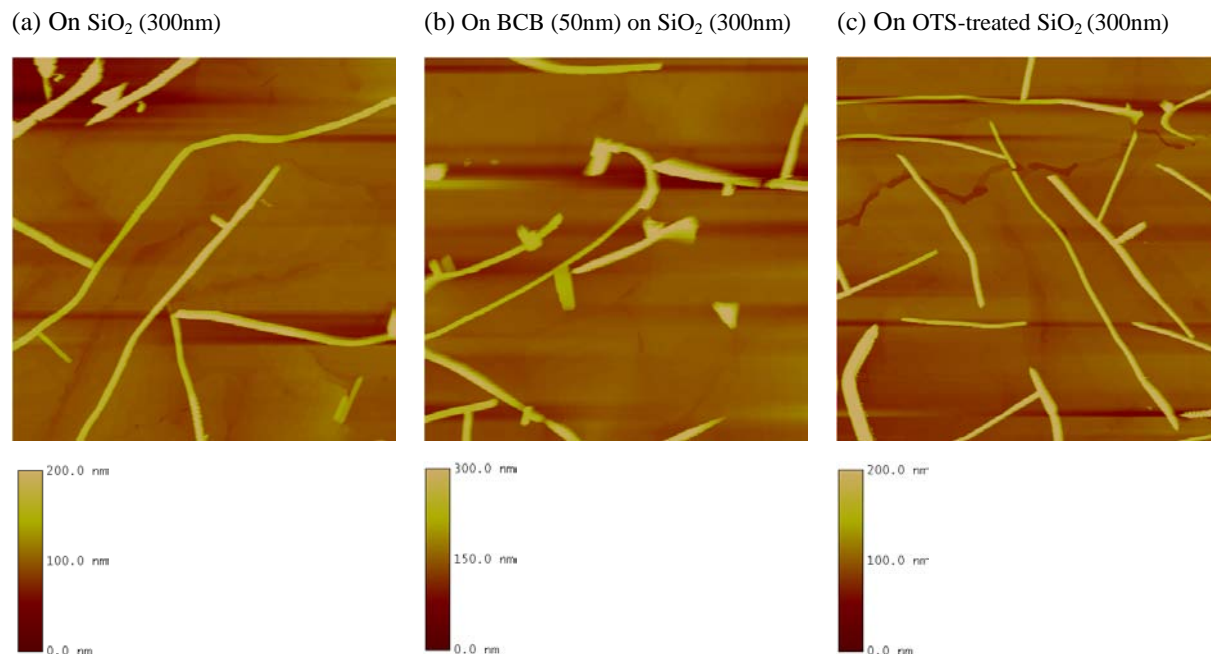

**Figure S19:** AFM height images of thin films of **4b** on three kinds of dielectric. The nominal thicknesses of all the films were 40nm. The substrate temperature during deposition was 60°C, at which we have obtained the highest mobility for **4b**. The sizes of all the images were 5μm×5μm.

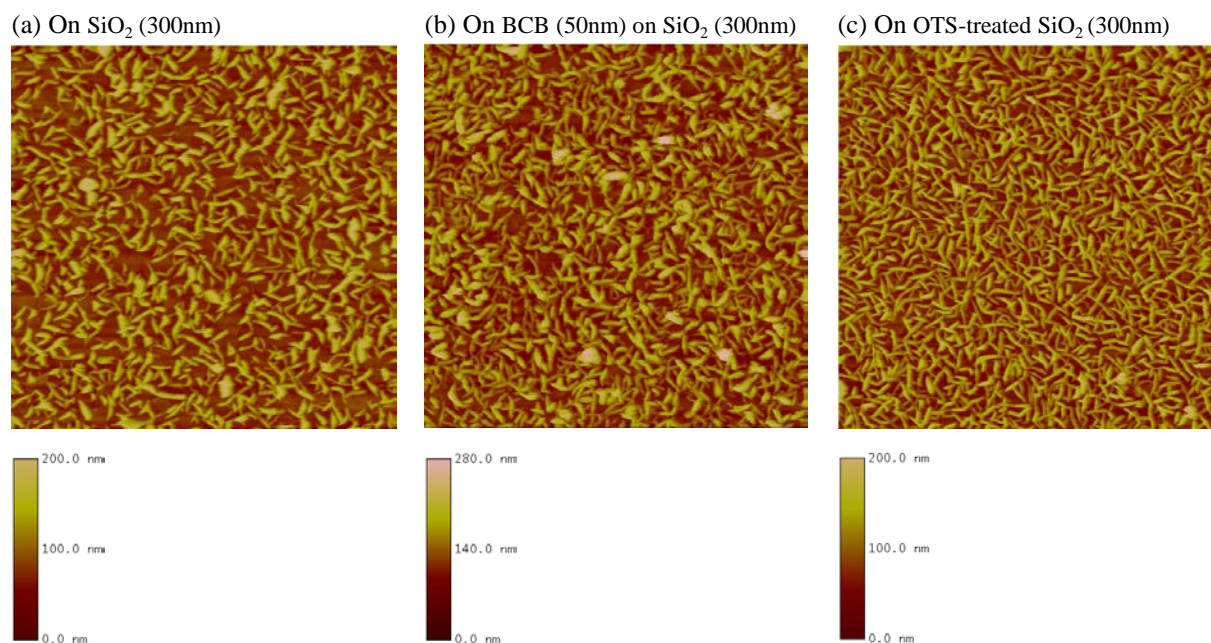



**Figure S20:** AFM height images of thin films of **4a** with various nominal thicknesses (1-40nm) grown on OTS-treated SiO<sub>2</sub>. The substrate temperature during deposition was 60°C. All the images were 2μm×2μm images.

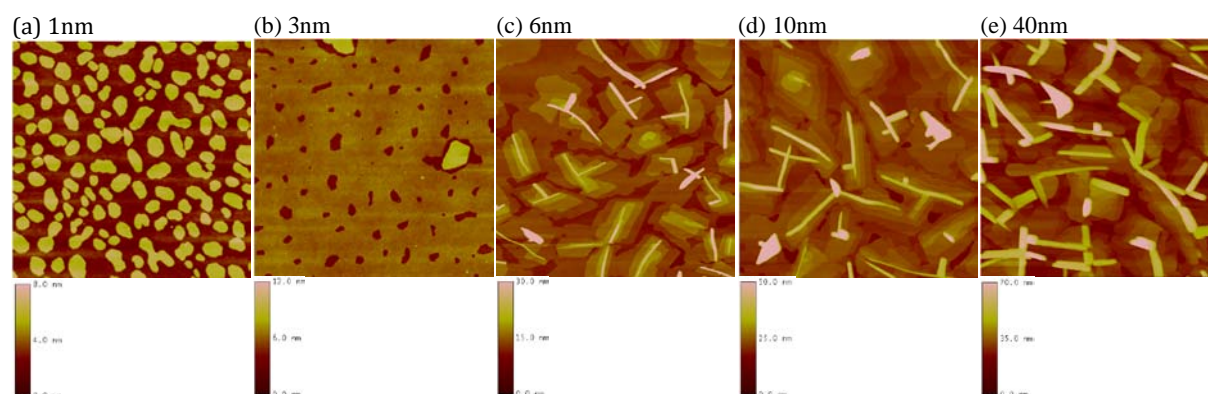

**Figure S21:** AFM phase images of thin films of **4b** with various nominal thicknesses (1-40nm) grown on OTS-treated SiO<sub>2</sub>. The substrate temperature during deposition was 60°C. All the images were 1μm×1μm images.

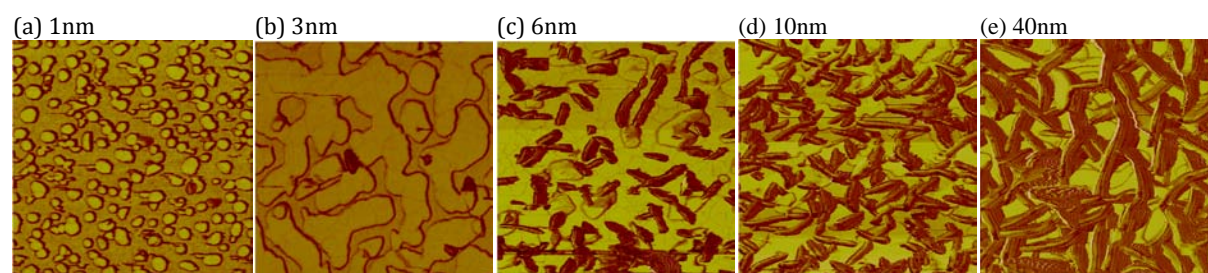

**Figure S22:** (a) optical micrograph and (b) cross-polarized optical micrograph of solution-sheared thin films of **1a**

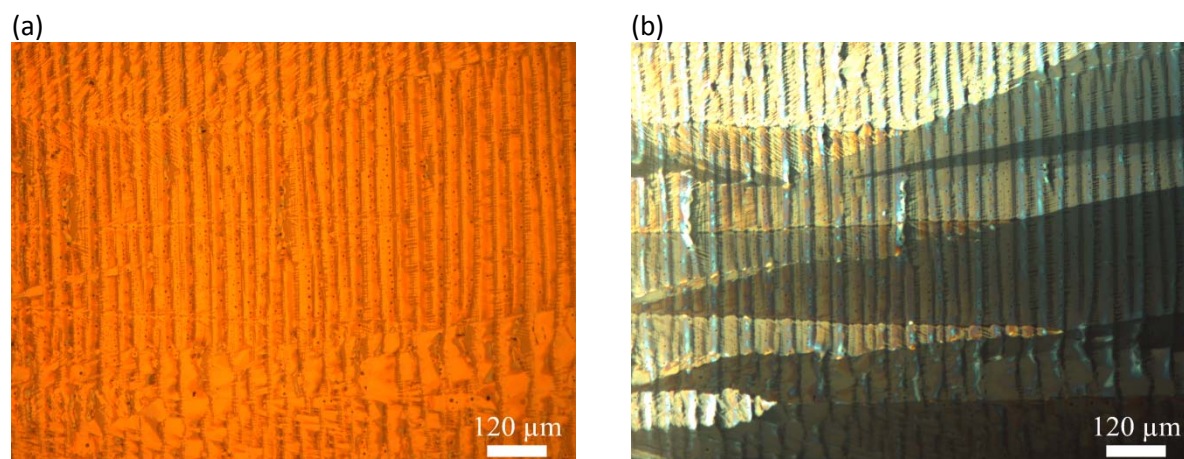

## Grazing incidence X-ray diffraction (GIXD) of thin films

**Figure S23:** Grazing incidence X-ray diffraction (GIXD) images of thin films (40nm) of **4a** (a-c) and **4b** (d-g) for various  $T_{\text{dep}}$ . The diffraction peaks indicated by orange arrows were not used to calculate lattice constants.

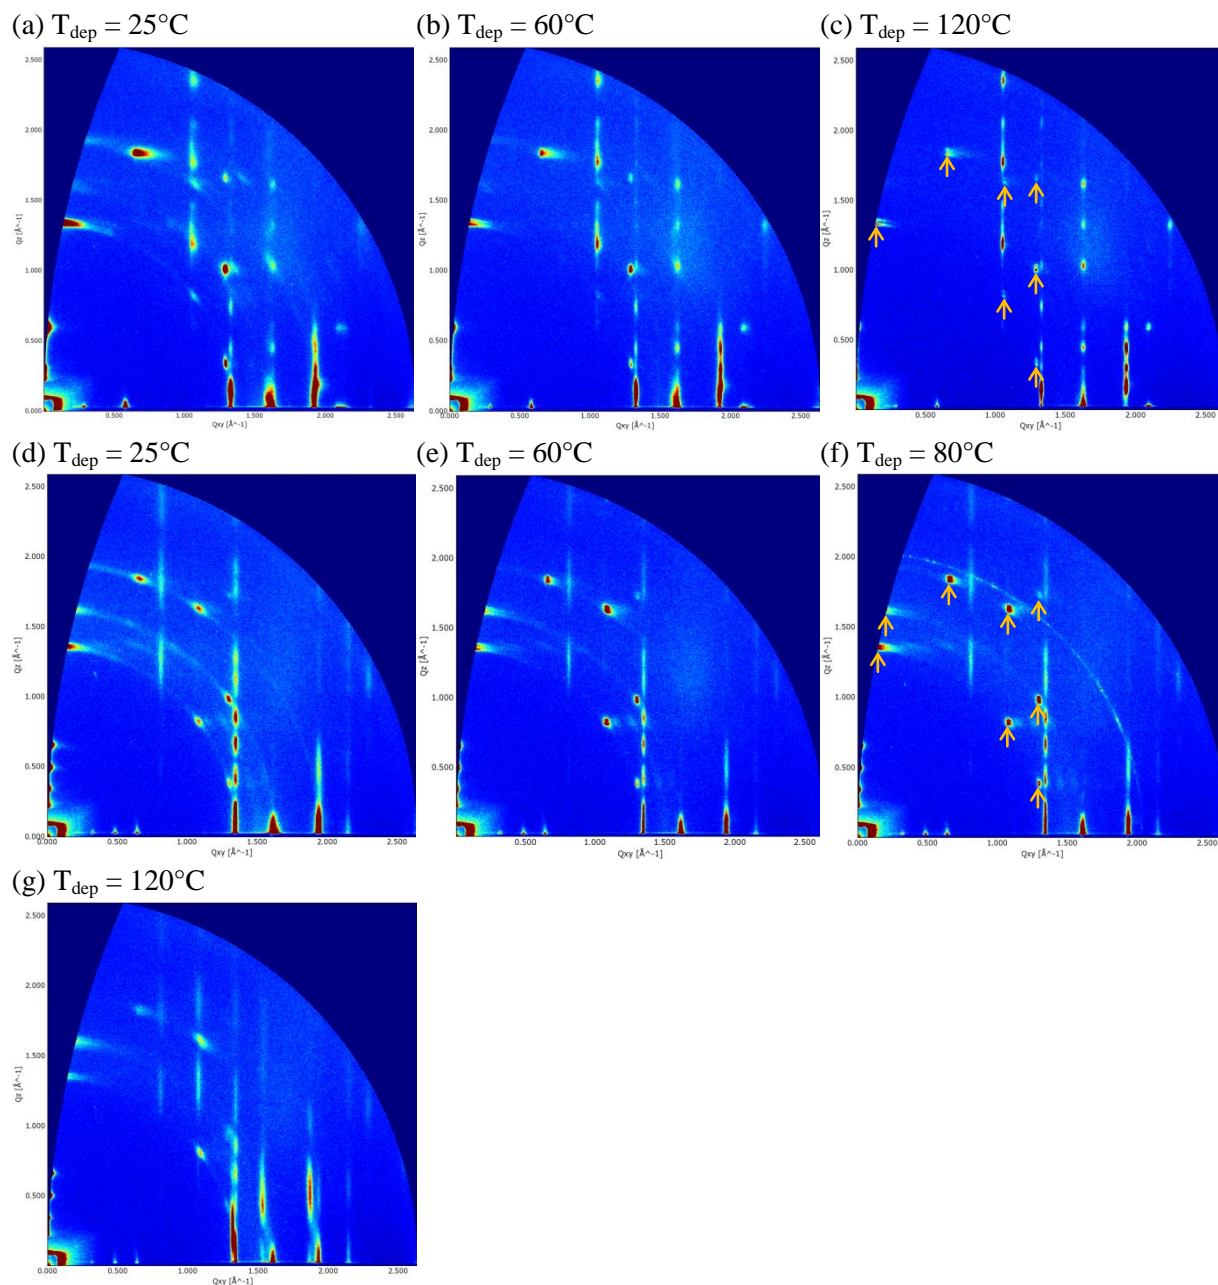

**Table S2:** Lattice parameters of thin films (40nm) of **4a** and **4b** as determined from GIXD data.

|                     | <b>4a</b> |                                      |                                       | <b>4b</b> |
|---------------------|-----------|--------------------------------------|---------------------------------------|-----------|
|                     | This work | Yu et al. <sup>1)</sup><br>(Phase A) | Yu et al. <sup>1)</sup><br>(Phase A*) | This work |
| T <sub>sub</sub>    | 120°C     | N/A                                  | N/A                                   | 80°C      |
| a (Å)               | 6.00      | 6.10                                 | 5.88                                  | 5.86      |
| b (Å)               | 7.74      | 7.82                                 | 8.08                                  | 7.81      |
| c (Å)               | 23.37     | N/A                                  | N/A                                   | 40.31     |
| α (°)               | 88.01     | N/A                                  | N/A                                   | 88.33     |
| β (°)               | 84.73     | N/A                                  | N/A                                   | 88.57     |
| γ (°)               | 89.96     | N/A                                  | N/A                                   | 90.09     |
| V (Å <sup>3</sup> ) | 1080      | N/A                                  | N/A                                   | 1845      |
| d(001)              | 23.25     | 21.86                                | 21.86                                 | 40.28     |

<sup>1)</sup> H. Yu, W. Li, H. Tian, H. Wang, D. Yan, J. Zhang, Y. Geng and F. Wang, *ACS Appl. Mater. Interfaces*, 2014, 6, 5255-5262.

**Figure S24:** Coherence lengths of thin films (40nm) of **4a** and **4b**. The coherence lengths were calculated from full width at half maximum (FWHM) of GIXD peaks using Scherrer's equation. (111) diffraction ( $Q_{xy}=1.3233\text{-}1.3252\text{\AA}^{-1}$  and  $Q_z=0.1460\text{-}0.1532\text{\AA}^{-1}$ ) was used to calculate the coherence lengths of **4a**. ( $\bar{1}\bar{1}4$ ) diffraction ( $Q_{xy}=1.3403\text{-}1.3418\text{\AA}^{-1}$  and  $Q_z=0.6628\text{-}0.6717\text{\AA}^{-1}$ ) was used for the coherence length calculations of **4b**.

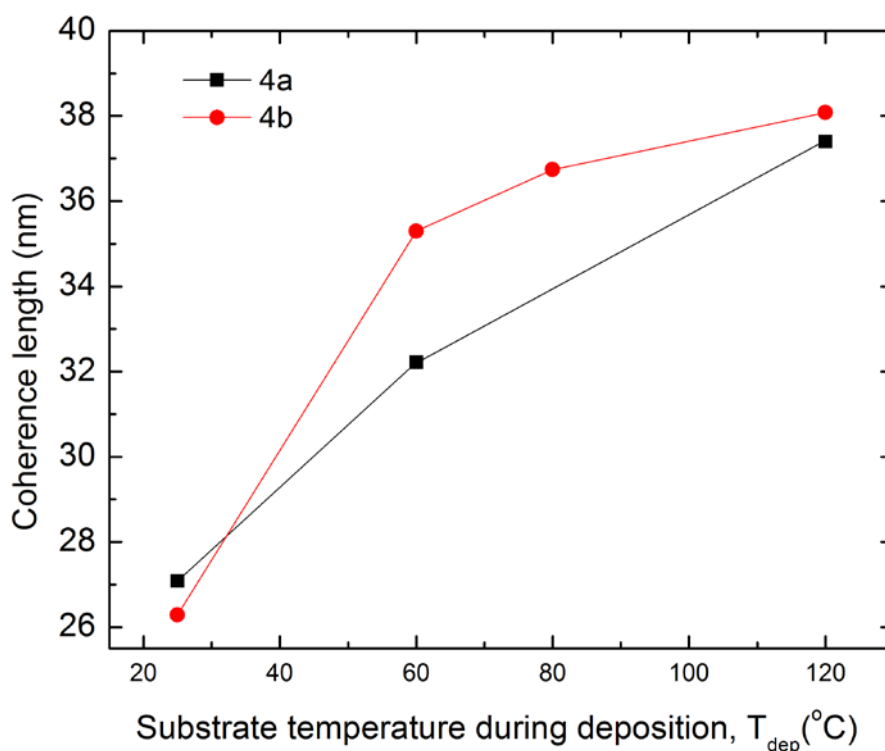

Supplement: c4tc02158d1.pdf [file c4tc02158d1.pdf]
